# Supplementary material
Source: Springer Nature journal article supplement (https://www.springermedizin.de/resource/supplementary/12935_2009_218_MOESM3_ESM.pdf/9541336)

**A**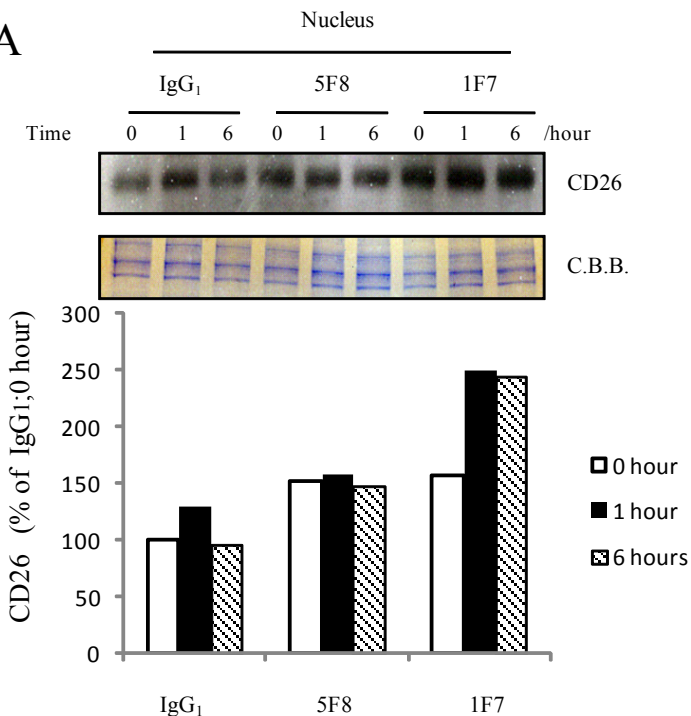**B**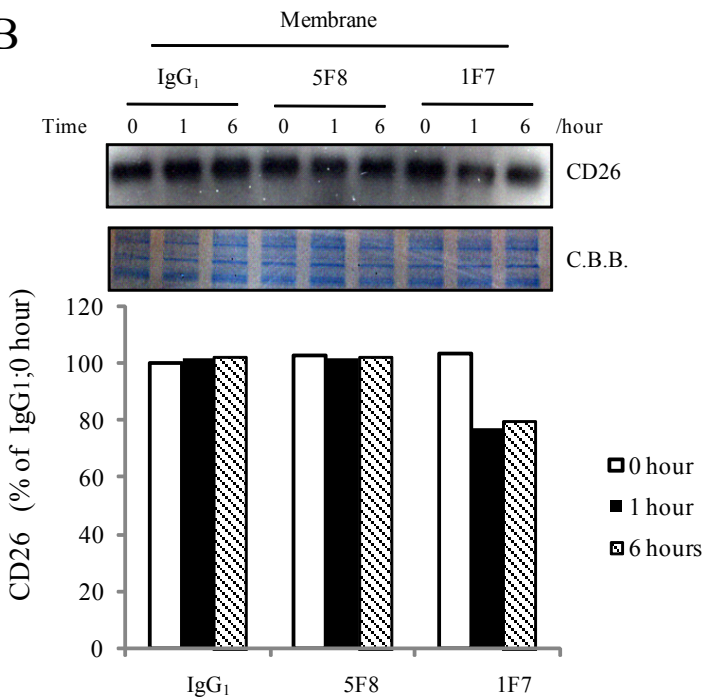

Supplement: MOESM3 [file 9541336]
